# Supplementary material
Source: publisher figshare collection journal article supplement (https://diabetesjournals.figshare.com/articles/dataset/_/19726099)
Supplement: Supplementary file 1 [file 1]

## Supplementary Appendix

**Table S1: Total number of women with CGM glucose available for analysis for each gestational week**

| <b>Gestational Week</b> | <b>Number of women</b> |
|-------------------------|------------------------|
| 0                       | 100                    |
| 1                       | 102                    |
| 2                       | 106                    |
| 3                       | 103                    |
| 4                       | 108                    |
| 5                       | 125                    |
| 6                       | 148                    |
| 7                       | 180                    |
| 8                       | 205                    |
| 9                       | 226                    |
| 10                      | 250                    |
| 11                      | 276                    |
| 12                      | 272                    |
| 13                      | 248                    |
| 14                      | 237                    |
| 15                      | 235                    |
| 16                      | 246                    |
| 17                      | 238                    |
| 18                      | 242                    |
| 19                      | 244                    |
| 20                      | 247                    |
| 21                      | 243                    |
| 22                      | 259                    |
| 23                      | 297                    |
| 24                      | 322                    |
| 25                      | 291                    |
| 26                      | 252                    |
| 27                      | 245                    |
| 28                      | 245                    |
| 29                      | 244                    |
| 30                      | 247                    |
| 31                      | 243                    |
| 32                      | 250                    |
| 33                      | 292                    |
| 34                      | 292                    |
| 35                      | 228                    |
| 36                      | 165                    |
| 37                      | 119                    |
| 38                      | 66                     |
| 39                      | 24                     |
